# Supplementary material for: Companion: A Pilot Randomized Clinical Trial to Test an Integrated Two-Way Communication and Near-Real-Time Sensing System for Detecting and Modifying Daily Inactivity among Adults >60 Years—Design and Protocol
Source: MDPI journal article supplement (doi:10.3390/s23042221), 2023-02-16
Supplement: s1 [file s1]

**Supplemental Table S1. Categorization of Companion and User Messages by Objective and Tone**

| <b>Categorization</b>     | <b>Definition</b>                                                                                                                                           |
|---------------------------|-------------------------------------------------------------------------------------------------------------------------------------------------------------|
| <i>Message Objective</i>  |                                                                                                                                                             |
| Educational               | A message meant to inform or educate on related health or study information.                                                                                |
| Activity related          | A message meant to elicit movement/activity.                                                                                                                |
| Commitment reminder       | A message meant to motivate intervention adherence by reminding a participant of their goals.                                                               |
| Goal setting              | Sets an achievable physical activity goal for the day; delivered early in the day.                                                                          |
| Self-monitoring           | Informs participant about their progress and aims to motivate them to achieve their physical activity goals.                                                |
| Goal achievement          | Informs the participants whether they achieved their goal for the day and aimed to motivate them to complete future goals; delivered at the end of the day. |
| Actionable tip            | A message that aims to provide strategies on how to better ensure goal achievement.                                                                         |
| Positive reinforcement    | A message that provides positive feedback when a participant is on track to achieve a pre-set goal or has already attained his or her goal.                 |
| Booster message           | A message to motivate individuals when they were not tracking to meet or surpass their daily goals.                                                         |
| Personal health           | A message that asks about or acknowledges the health of the specific participant (sleep, diet, activity level, etc.).                                       |
| Inquiry/elicited response | A message that asks a question or encourages a reply from the participant.                                                                                  |
| Repeated                  | A message that is sent multiple times throughout a day or duration of the study.                                                                            |
| Social                    | A message meant to develop a relationship or humanize the messenger.                                                                                        |
| Greeting message          | A generic greeting message that precedes an intervention message.                                                                                           |
| Miscellaneous             | A message that does not fall into any of the above categories.                                                                                              |

| <i>Companion Message Tone</i> |                                                                                                                                                                                            |
|-------------------------------|--------------------------------------------------------------------------------------------------------------------------------------------------------------------------------------------|
| Informative/educational       | A message that aims to educate or inform, often health or study related.                                                                                                                   |
| Inquisitive                   | A message that asks a question.                                                                                                                                                            |
| Supportive/empowering         | A message that aims to motivate self-monitoring and intervention adherence.                                                                                                                |
| Threatening/consequential     | A message that aims to motivate adherence through acknowledging negative outcomes of failure in maintaining a goal, often educational or statistical.                                      |
| Humorous                      | A message that uses humor to encourage adherence or engagement.                                                                                                                            |
| Celebratory                   | A message that celebrates or congratulates a user for accomplishing a goal.                                                                                                                |
| Sympathetic/understanding     | A message that acknowledges a failure to achieve a goal and aims to motivate for future goal achievements.                                                                                 |
| Social                        | A message meant to develop a relationship or humanize the messenger.                                                                                                                       |
| Miscellaneous                 | A message that does not fall into any of the above categories.                                                                                                                             |
| <i>User Message Tone</i>      |                                                                                                                                                                                            |
| Informative                   | User is answering a question or relaying information about themselves to Companion.                                                                                                        |
| Inquisitive                   | User asks a question.                                                                                                                                                                      |
| Appreciative                  | User sends a message of gratitude towards a previous message or towards Companion in general.                                                                                              |
| Negative                      | User responds negatively or replies "no" to a message eliciting a response.                                                                                                                |
| Humorous                      | User responds with humor or a message that implies laughter.                                                                                                                               |
| Social                        | User engages with a message or messages through continuing conversation with more than one reply or longer message responses with the aim of developing a relationship with the Companion. |
| Miscellaneous                 | Any message that does not easily fit into any of the above categories.                                                                                                                     |
